# Supplementary material for: In Vitro Anti-Proliferative and Apoptotic Effects of Hydroxytyrosyl Oleate on SH-SY5Y Human Neuroblastoma Cells
Source: MDPI journal article supplement (doi:10.3390/ijms232012348), 2022-10-15
Supplement: s1 [file s1]

| Table S1: Volcano Plot. |                |            |           |             |                                                                                        |           |                      |
|-------------------------|----------------|------------|-----------|-------------|----------------------------------------------------------------------------------------|-----------|----------------------|
| Significant             | =-LOG(P-value) | Difference | Accession | ID          | Description                                                                            | Gene      | Volcano plot results |
| +                       | 2,99           | 3,80       | O00458    | IFRD1_HUMAN | Interferon-relateddevelopmentalregulator1                                              | IFRD1     | up in HTyrol         |
| +                       | 5,52           | 3,58       | O15240    | VGF_HUMAN   | NeurosecretoryproteinVGF                                                               | VGF       | up in HTyrol         |
| +                       | 2,91           | -2,92      | O60343    | TBCD4_HUMAN | TBC1domainfamilymember4                                                                | TBC1D4    | down in HTyrOL       |
| +                       | 2,16           | 3,10       | O75367    | H2AY_HUMAN  | Corehistonemacro-H2A.1                                                                 | MACROH2A1 | up in HTyrol         |
| +                       | 4,19           | -3,44      | O75376    | NCOR1_HUMAN | Nuclearreceptorcorepressor1                                                            | NCOR1     | down in HTyrOL       |
| +                       | 2,62           | 3,52       | O76080    | ZFAN5_HUMAN | AN1-typezincfingerprotein5                                                             | ZFAND5    | up in HTyrol         |
| +                       | 4,45           | 2,84       | O95817    | BAG3_HUMAN  | BAGfamilymolecularchaperoneregulator3                                                  | BAG3      | up in HTyrol         |
| +                       | 2,74           | 5,02       | P09601    | HMOX1_HUMAN | Hemeoxygenase1                                                                         | HMOX1     | up in HTyrol         |
| +                       | 3,14           | 3,81       | P10909    | CLUS_HUMAN  | Clusterin                                                                              | CLU       | up in HTyrol         |
| +                       | 3,25           | -2,30      | P51553    | IDH3G_HUMAN | Isocitrate dehydrogenase[NAD]subunitgamma,mitochondrial                                | IDH3G     | down in HTyrOL       |
| +                       | 3,28           | -2,62      | P56270    | MAZ_HUMAN   | Myc-associatedzincfingerprotein                                                        | MAZ       | down in HTyrOL       |
| +                       | 2,38           | 3,10       | P62805    | H4_HUMAN    | HistoneH4                                                                              | H4-16     | up in HTyrol         |
| +                       | 3,86           | 2,04       | Q04446    | GLGB_HUMAN  | 1,4-alpha-glucan-branchingenzyme                                                       | GBE1      | up in HTyrol         |
| +                       | 3,28           | 2,16       | Q13501    | SQSTM_HUMAN | Sequestosome-1                                                                         | SQSTM1    | up in HTyrol         |
| +                       | 2,80           | -2,21      | Q13547    | HDAC1_HUMAN | Histone deacetylase1                                                                   | HDAC1     | down in HTyrOL       |
| +                       | 3,42           | 3,35       | Q14517    | FAT1_HUMAN  | ProtocadherinFat1                                                                      | FAT1      | up in HTyrol         |
| +                       | 3,56           | -2,22      | Q14684    | RRP1B_HUMAN | RibosomalRNAprocessingprotein1homologB                                                 | RRP1B     | down in HTyrOL       |
| +                       | 3,44           | 5,31       | Q15011    | HERP1_HUMAN | Homocysteine-responsiveendoplasmicreticulum-residentubiquitin-likedomainmember1protein | HERPUD1   | up in HTyrol         |
| +                       | 2,07           | 2,86       | Q16777    | H2A2C_HUMAN | HistoneH2Atype2-C                                                                      | H2AC20    | up in HTyrol         |
| +                       | 1,93           | 3,54       | Q16778    | H2B2E_HUMAN | HistoneH2Btype2-E                                                                      | H2BC21    | up in HTyrol         |
| +                       | 2,35           | -2,44      | Q3ZCT1    | ZN260_HUMAN | Zincfingerprotein260                                                                   | ZNF260    | down in HTyrOL       |
| +                       | 2,41           | 3,93       | Q5TEC6    | H3PS2_HUMAN | HistoneHIST2H3PS2                                                                      | H3-2      | up in HTyrol         |
| +                       | 2,68           | -2,41      | Q6IN84    | MRM1_HUMAN  | rRNAmethyltransferase1,mitochondrial                                                   | MRM1      | down in HTyrOL       |
| +                       | 4,19           | -2,33      | Q8N2U9    | S66A2_HUMAN | Solute carrier family66member2                                                         | SLC66A2   | down in HTyrOL       |
| +                       | 2,42           | -2,69      | Q8TCC3    | RM30_HUMAN  | 39SribosomalproteinL30,mitochondrial                                                   | MRPL30    | down in HTyrOL       |
| +                       | 2,07           | -2,88      | Q8WVB6    | CTF18_HUMAN | Chromosome transmission fidelity protein18homolog                                      | CHTF18    | down in HTyrOL       |
| +                       | 2,79           | -2,63      | Q969E4    | TCAL3_HUMAN | Transcription elongation factor A protein-like3                                        | TCEAL3    | down in HTyrOL       |
| +                       | 3,32           | -2,42      | Q96G46    | DUS3L_HUMAN | tRNA-dihydrouridine(47)synthase[NAD(P)(+)]-like                                        | DUS3L     | down in HTyrOL       |
| +                       | 2,30           | -3,02      | Q96MX3    | ZNF48_HUMAN | Zincfingerprotein48                                                                    | ZNF48     | down in HTyrOL       |
| +                       | 2,72           | -3,15      | Q96NE9    | FRMD6_HUMAN | FERM domain-containing protein6                                                        | FRMD6     | down in HTyrOL       |
| +                       | 3,42           | -2,40      | Q96QC0    | PP1RA_HUMAN | Serine/threonine-protein phosphatase1regulatory subunit10                              | PPP1R10   | down in HTyrOL       |

|   |      |       |        |             |                                             |          |                |
|---|------|-------|--------|-------------|---------------------------------------------|----------|----------------|
| + | 2,64 | 3,07  | Q9BYN0 | SRXN1_HUMAN | Sulfiredoxin-1                              | SRXN1    | up in HTyrol   |
| + | 2,62 | 3,44  | Q9BZQ8 | NIBA1_HUMAN | ProteinNiban1                               | NIBAN1   | up in HTyrol   |
| + | 3,18 | -2,19 | Q9NX58 | LYAR_HUMAN  | Cellgrowth-regulatingnucleolarprotein       | LYAR     | down in HTyrOL |
| + | 2,51 | -2,68 | Q9NYP7 | ELOV5_HUMAN | Elongationofverylongchainfattyacidsprotein5 | ELOVL5   | down in HTyrOL |
| + | 3,46 | -2,63 | Q9UKB3 | DJC12_HUMAN | DnaJhomologsubfamilyCmember12               | DNAJC12  | down in HTyrOL |
| + | 3,17 | -4,16 | Q9UNS1 | TIM_HUMAN   | Proteintimelesshomolog                      | TIMELESS | down in HTyrOL |
| + | 3,27 | -3,10 | Q9Y6X9 | MORC2_HUMAN | ATPaseMORC2                                 | MORC2    | down in HTyrOL |
